# Supplementary material for: Structural classification of Ag and Cu nanocrystals with machine learning
Source: Royal Society of Chemistry journal article supplement (doi:10.1039/d4nr02531h), 2024-01-01
Supplement: d4nr02531h3.pdf [file d4nr02531h3.pdf]

# Electronic Supporting Information

## Structural Classification of Ag and Cu Nanocrystals with Machine Learning

Huaizhong Zhang<sup>a</sup> and Kristen A. Fichthorn<sup>\*a,b</sup>

<sup>a</sup>Department of Chemical Engineering, The Pennsylvania State University, University  
Park, Pennsylvania 16802, USA

<sup>b</sup>Department of Physics, The Pennsylvania State University, University Park, Pennsylvania  
16802, USA

\*Email: [fichthorn@psu.edu](mailto:fichthorn@psu.edu)

# CNA Signature List

In Table S1, we present the list of 32 combinations of CNA signatures used to build our feature set.

Table S1: Atomic CNA signatures for the most common environments observed in this study.  $C_N$  is the coordination number and in  $\{i, j, k\}(\#)$ ,  $\#$  is the number of bonds with  $\{i, j, k\}$  indices.

| Atom Type                                                    | $C_N$ | $\{i, j, k\}(\#)$ |
|--------------------------------------------------------------|-------|-------------------|-------------------|-------------------|-------------------|-------------------|-------------------|
| FCC bulk                                                     | 12    | {4,2,1}(12)       |                   |                   |                   |                   |                   |
| HCP bulk                                                     | 12    | {4,2,1}(6)        | {4,2,2}(6)        |                   |                   |                   |                   |
| FCC{111} surface                                             | 9     | {4,2,1}(3)        | {3,1,1}(6)        |                   |                   |                   |                   |
| FCC vertex                                                   | 6     | {4,2,1}(1)        | {3,1,1}(2)        | {2,1,1}(2)        | {2,0,0}(1)        |                   |                   |
| FCC {111}-{100} edge                                         | 7     | {4,2,1}(2)        | {3,1,1}(2)        | {2,1,1}(3)        |                   |                   |                   |
| FCC {111}-{111} edge                                         | 7     | {4,2,1}(1)        | {3,1,1}(4)        | {2,0,0}(2)        |                   |                   |                   |
| Ih spine                                                     | 12    | {4,2,2}(10)       | {5,5,5}(2)        |                   |                   |                   |                   |
| Ih surface edge                                              | 8     | {4,2,2}(2)        | {3,2,2}(2)        | {3,1,1}(4)        |                   |                   |                   |
| Dh-Ih notch vertex                                           | 7     | {4,2,2}(1)        | {3,2,2}(1)        | {3,1,1}(2)        | {3,0,0}(1)        | {2,0,0}(2)        |                   |
| Dh notch edge                                                | 10    | {4,2,2}(2)        | {4,2,1}(2)        | {3,1,1}(4)        | {3,0,0}(2)        |                   |                   |
| twisted Ih surface edge                                      | 9     | {4,2,2}(2)        | {4,2,1}(2)        | {3,2,2}(2)        | {3,1,1}(2)        | {2,1,1}(1)        |                   |
| twisted Ih surface vertex                                    | 6     | {4,2,2}(1)        | {3,2,2}(1)        | {3,1,1}(1)        | {2,1,1}(1)        | {2,0,0}(2)        |                   |
| Ih center                                                    | 12    | {5,5,5}(12)       |                   |                   |                   |                   |                   |
| FCC {100} surface                                            | 8     | {4,2,1}(4)        | {2,1,1}(4)        |                   |                   |                   |                   |
| Ih/Dh surface vertex                                         | 6     | {5,5,5}(1)        | {3,2,2}(5)        |                   |                   |                   |                   |
| Dh-Ih bulk 5-fold ring: 1                                    | 11    | {4,2,2}(3)        | {4,2,1}(2)        | {4,3,3}(1)        | {3,1,1}(3)        | {3,2,2}(1)        | {2,0,0}(1)        |
| Dh-Ih bulk 5-fold ring: 2                                    | 11    | {4,2,2}(4)        | {4,2,1}(2)        | {4,3,3}(1)        | {3,1,1}(3)        | {3,0,0}(1)        |                   |
| Dh-Ih bulk 5-fold ring: 3                                    | 11    | {4,2,2}(4)        | {4,1,1}(1)        | {3,1,1}(3)        | {3,0,0}(1)        | {2,0,0}(2)        |                   |
| Dh-Ih bulk 5-fold ring: 4                                    | 11    | {5,5,5}(1)        | {4,2,2}(6)        | {3,1,1}(2)        | {3,2,2}(1)        | {2,0,0}(1)        |                   |
| Dh-Ih {111} surface                                          | 9     | {4,1,1}(1)        | {3,1,1}(8)        |                   |                   |                   |                   |
| Dh-Ih surface edge                                           | 8     | {4,2,2}(1)        | {3,2,2}(1)        | {3,1,1}(5)        | {2,0,0}(1)        |                   |                   |
| Dh-Ih {111}-{100} edge                                       | 7     | {4,3,3}(1)        | {3,2,2}(2)        | {3,1,1}(2)        | {2,0,0}(2)        |                   |                   |
| Dh-Ih surface vertex                                         | 6     | {4,3,3}(1)        | {3,2,2}(2)        | {3,1,1}(2)        | {2,0,0}(1)        |                   |                   |
| Twisted Ih surface edge vertex                               | 8     | {5,5,5}(1)        | {4,2,2}(2)        | {3,2,2}(3)        | {2,0,0}(2)        |                   |                   |
| HCP {10 $\bar{1}$ 1} surface<br>& edge anti-Mackay           | 8     | {4,2,1}(1)        | {3,1,1}(2)        | {4,2,2}(2)        | {2,0,0}(2)        | {2,1,1}(1)        |                   |
| HCP {10 $\bar{1}$ 0}-{10 $\bar{1}$ 1} edge<br>sharp FCC edge | 7     | {2,0,0}(1)        | {2,1,1}(2)        | {4,2,2}(1)        | {4,2,1}(1)        | {3,2,2}(1)        | {3,1,1}(1)        |
| between HCP islands<br>missing 5-fold vertex                 | 10    | {3,1,1}(4)        | {4,2,2}(4)        | {4,3,3}(2)        |                   |                   |                   |
| am surrounding atoms<br>atoms around noncentral hole         | 7     | {4,3,3}(1)        | {2,1,1}(2)        | {2,0,0}(2)        | {4,2,2}(2)        |                   |                   |
| in Ih                                                        | 11    | {3,1,1}(4)        | {4,2,1}(7)        |                   |                   |                   |                   |
| type 1                                                       | 5     | {2,0,0}(2)        | {3,1,1}(2)        | {2,1,1}(1)        |                   |                   |                   |
| type 2                                                       | 8     | {3,1,1}(4)        | {2,1,1}(1)        | {4,2,1}(2)        | {2,0,0}(1)        |                   |                   |
| type 3                                                       | 12    | {4,2,1}(5)        | {4,2,2}(4)        | {3,1,1}(2)        | {4,1,1}(1)        |                   |                   |

# Ag Fraction of Atomic CNA Environments

In Figures S1 to S4, we present the fraction of atomic CNA environments for all 14 structural classes grouped by *K*-Means clustering, except for 3 classes relevant to FCC/SCSF, which were shown in the main text.

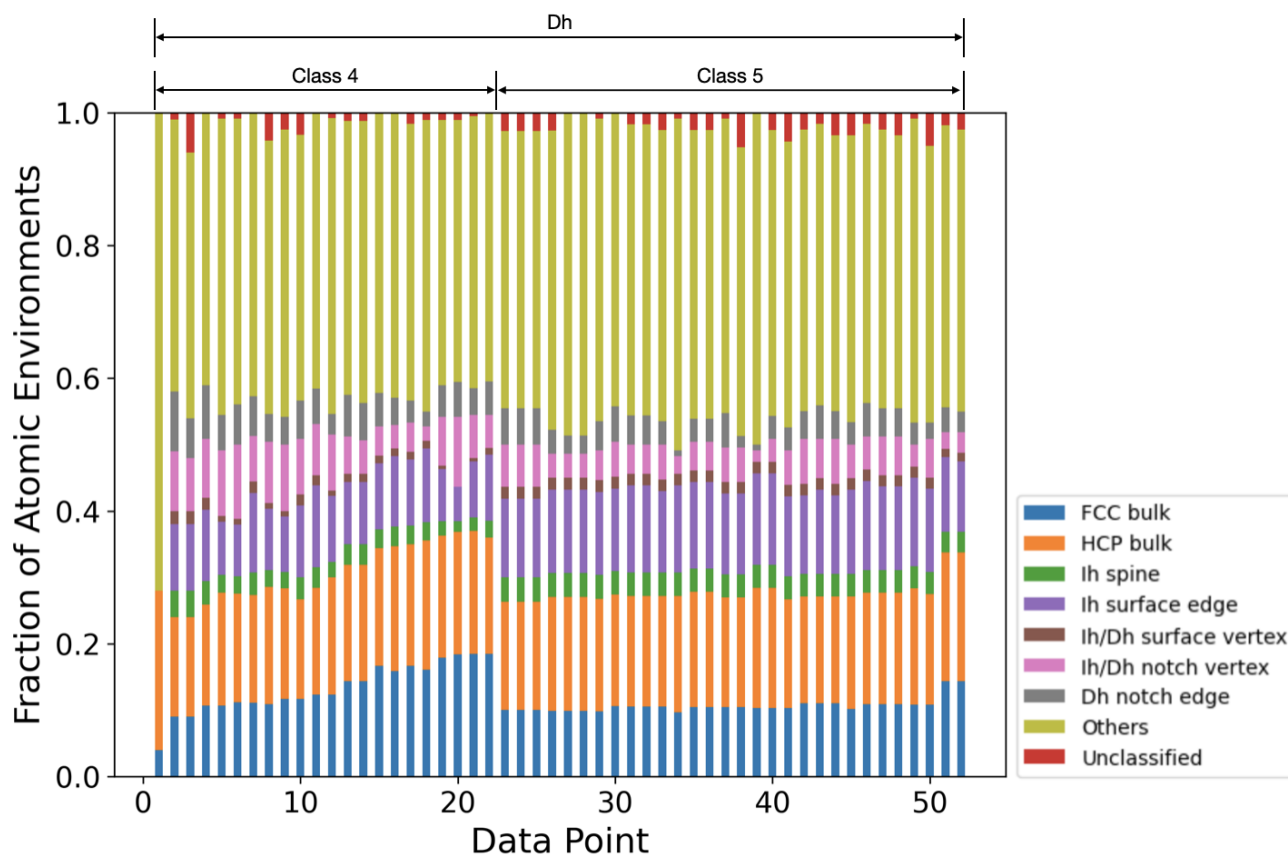

Figure S1: Fraction of atomic CNA environments (see Table S1) for the two Dh classes for Ag.

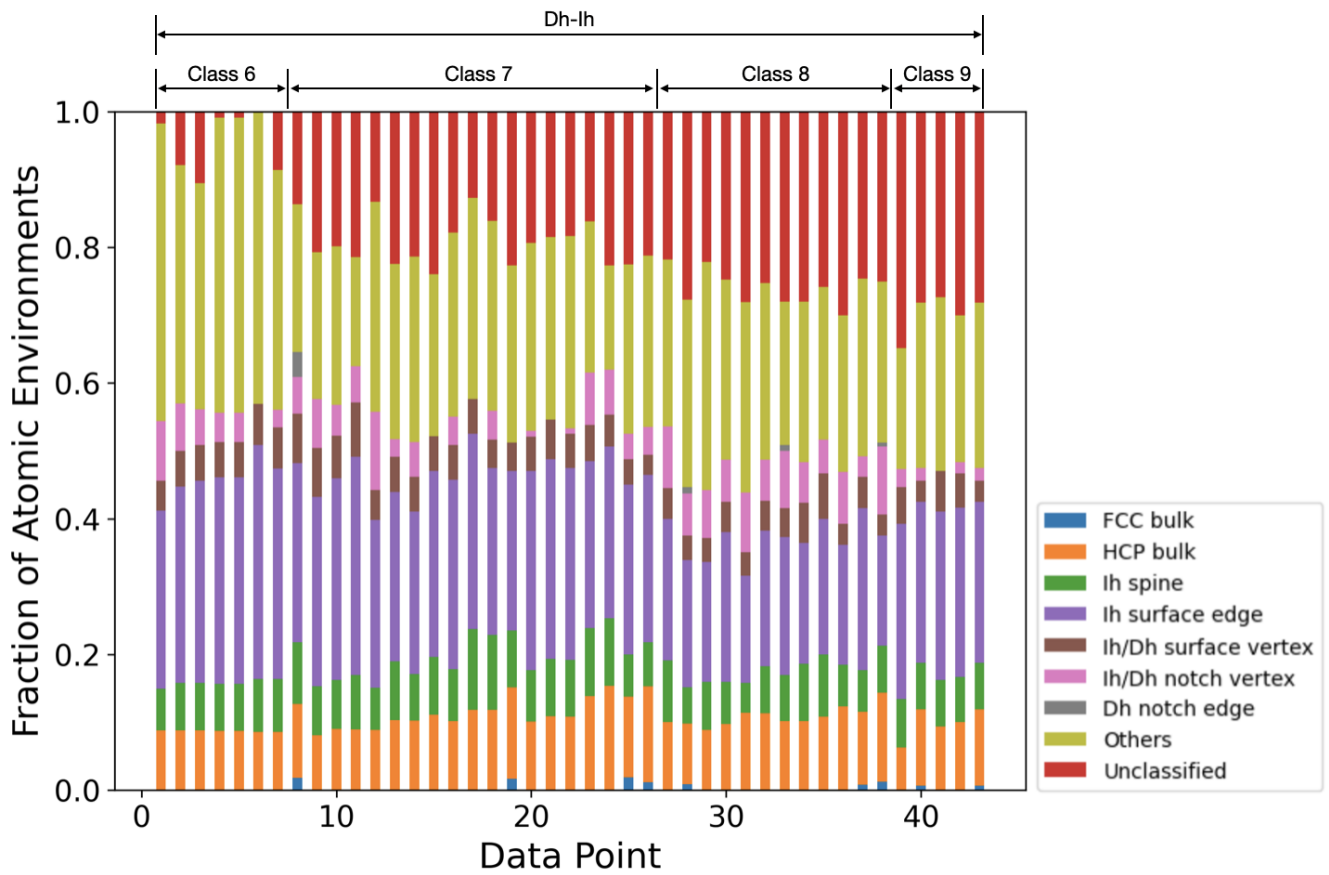

Figure S2: Fraction of atomic CNA environments (see Table S1) for the four Dh-Ih classes for Ag.

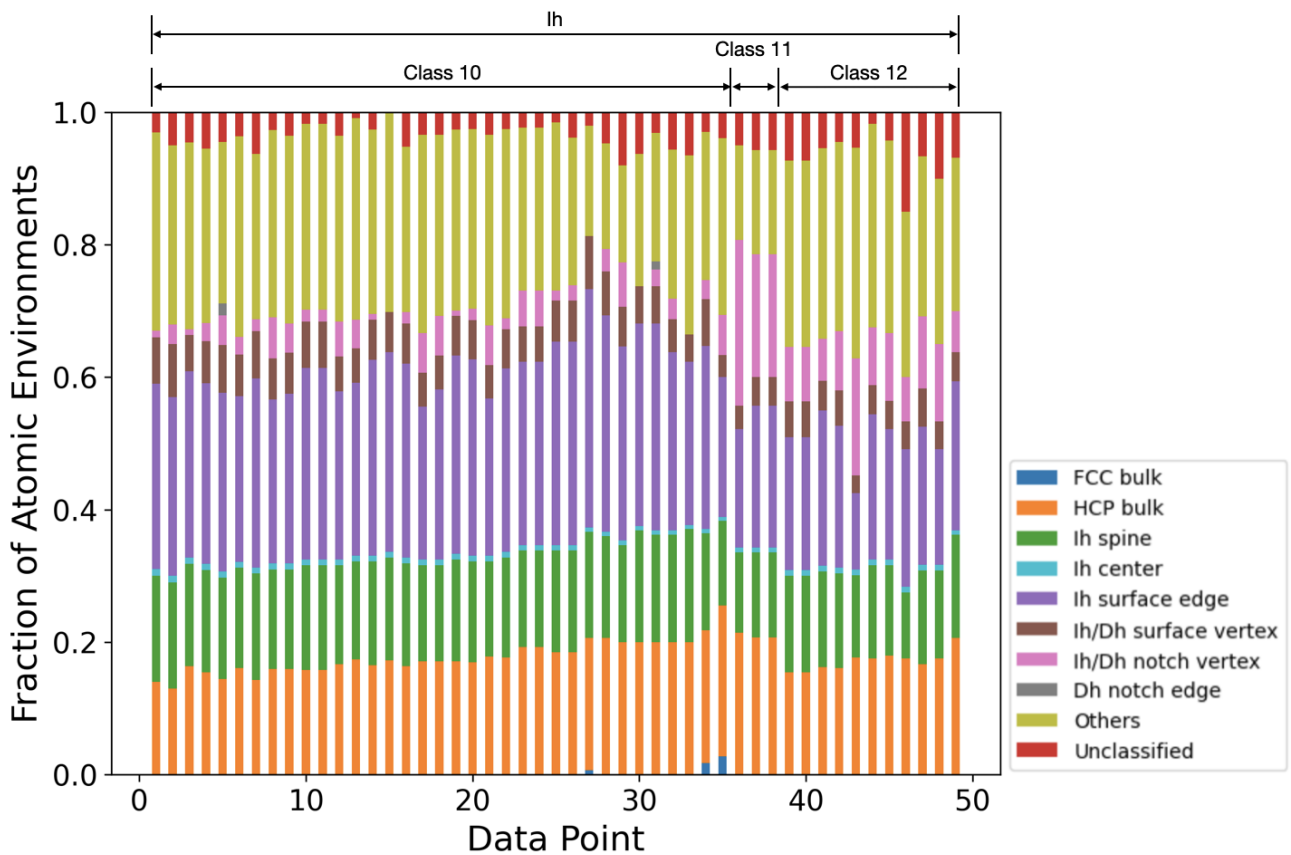

Figure S3: Fraction of atomic CNA environments (see Table S1) for the three Ih classes for Ag.

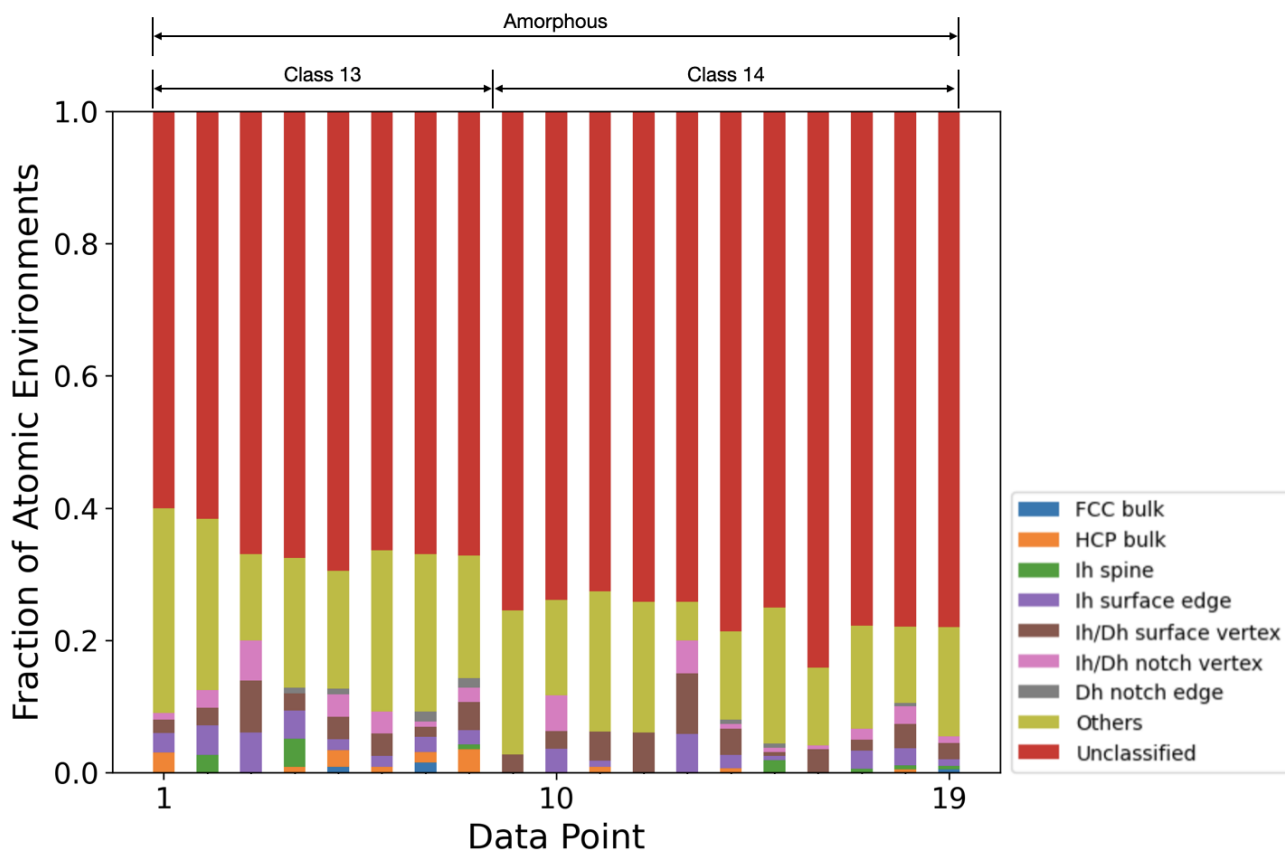

Figure S4: Fraction of atomic CNA environments (see Table S1) for the two Amorphous classes for Ag.

## Cu Fraction of Atomic CNA Environments

In Figures S5 to S9, we present the fraction of atomic CNA environments for all 15 structural classes grouped by *K*-Means clustering.

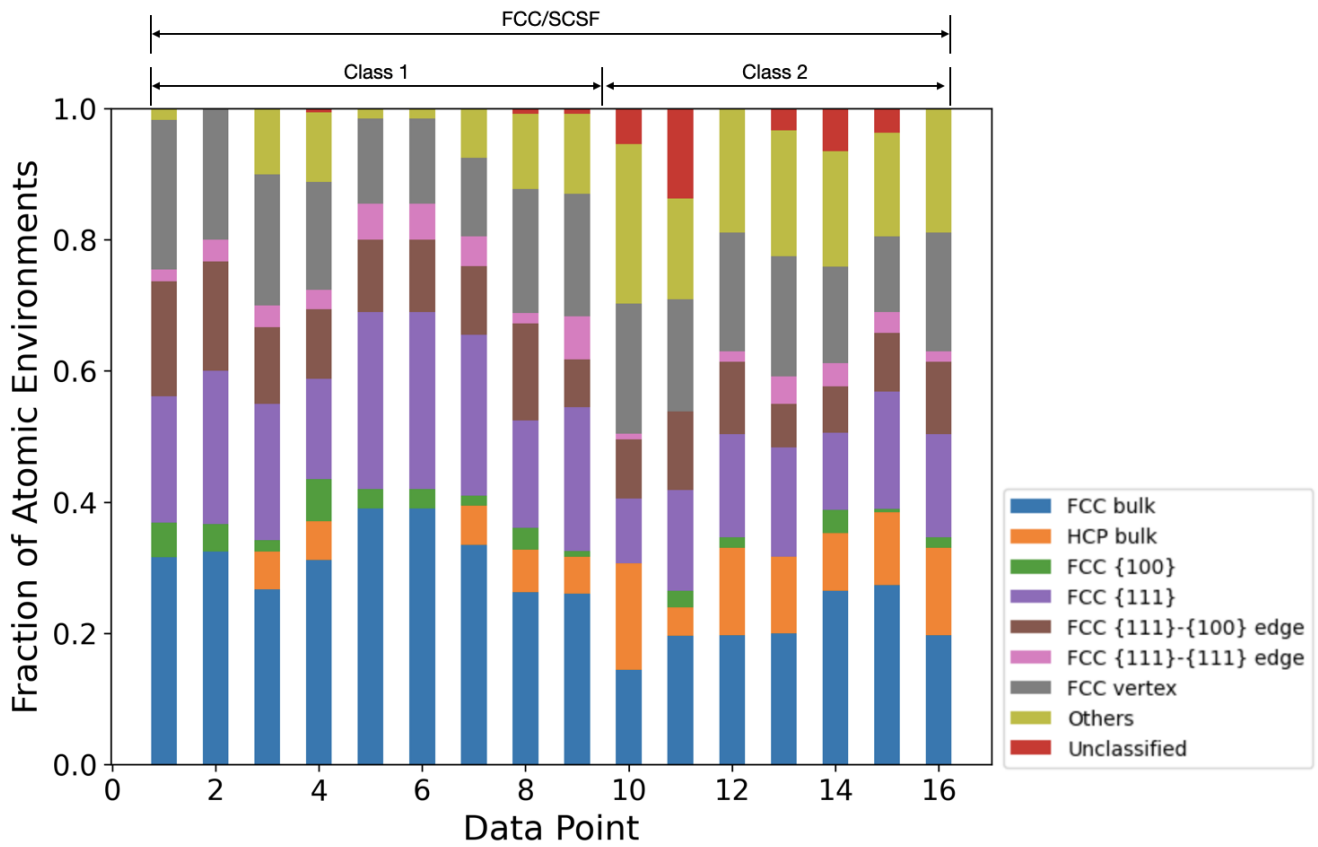

Figure S5: Fraction of atomic CNA environments (see Table S1) for the two FCC/SCSF classes for Cu.

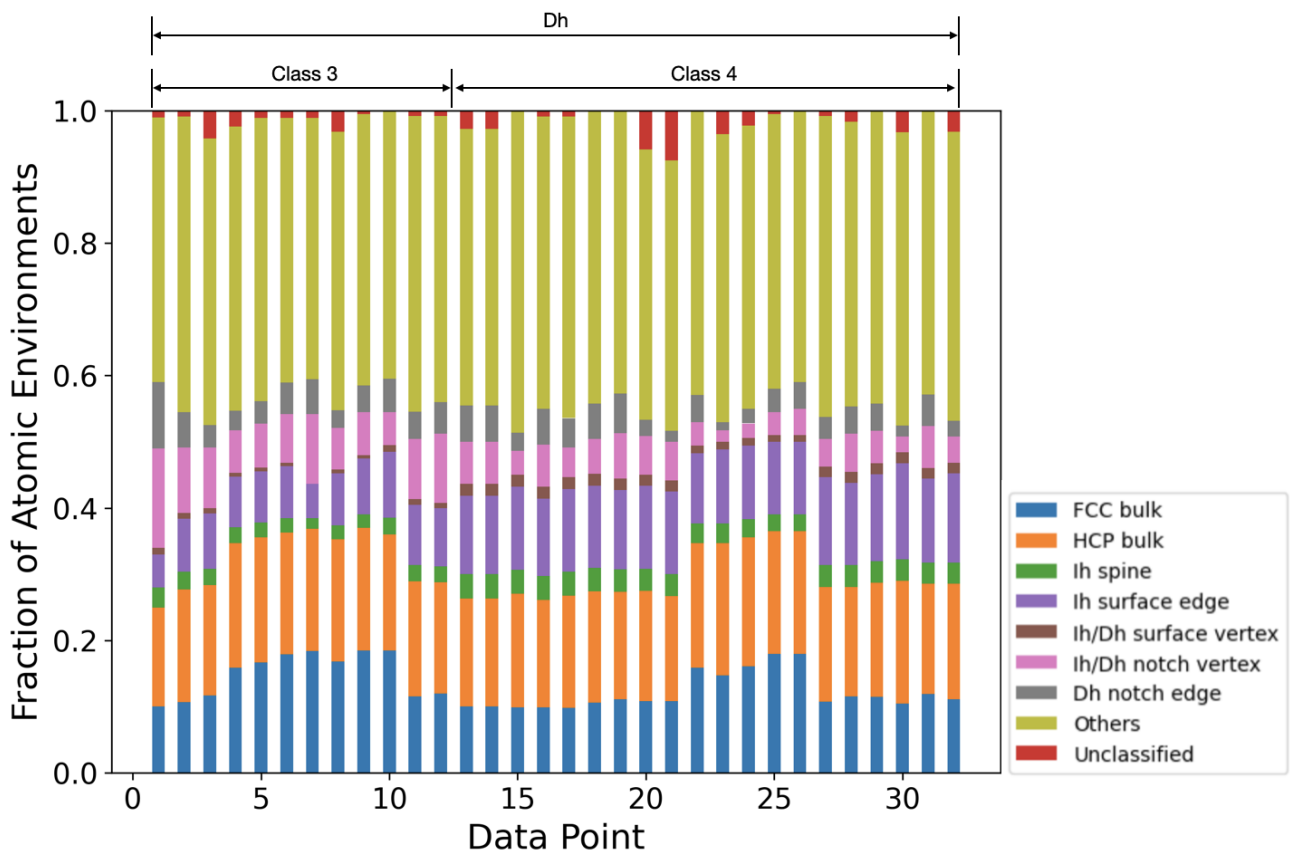

Figure S6: Fraction of atomic CNA environments (see Table S1) for the two Dh classes for Cu.

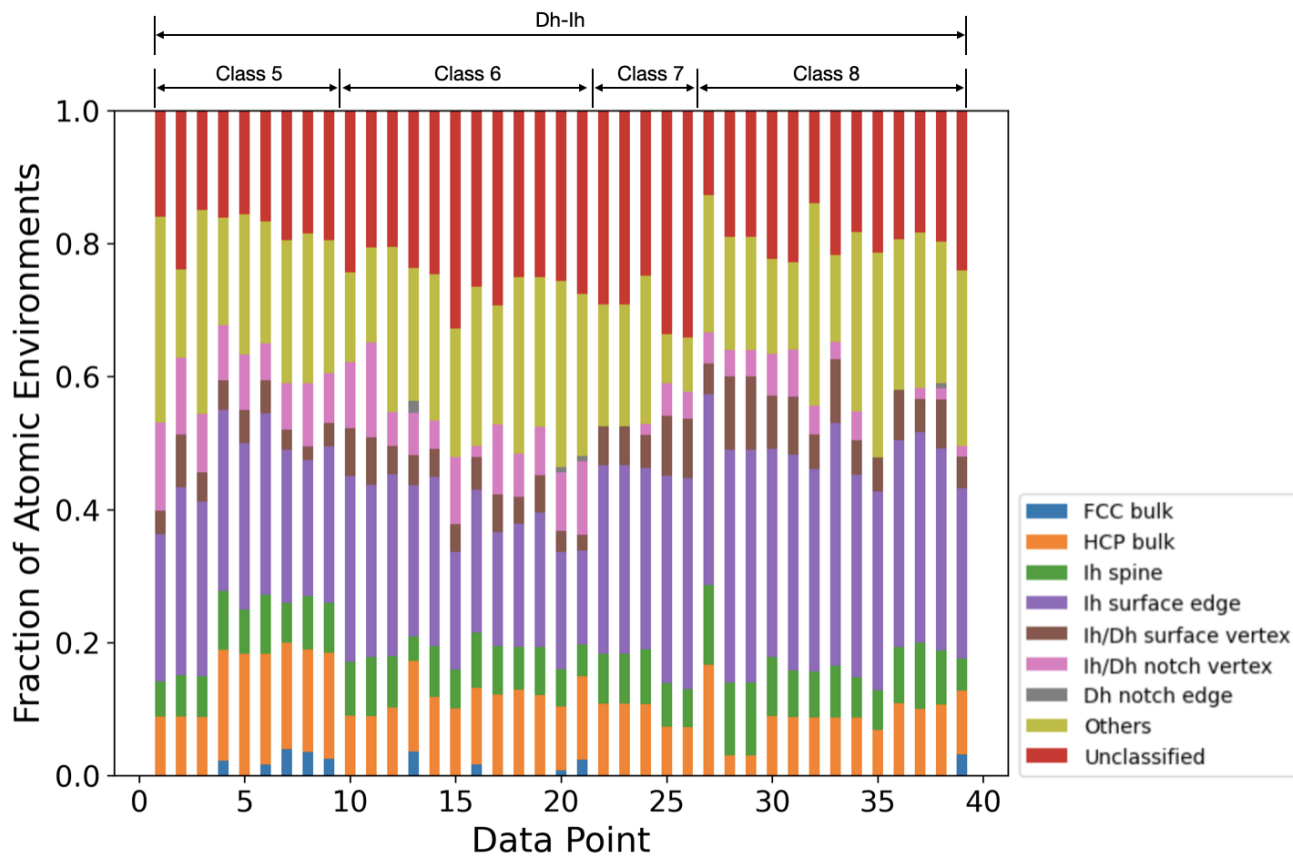

Figure S7: Fraction of atomic CNA environments (see Table S1) for the four Dh-Ih classes for Cu.

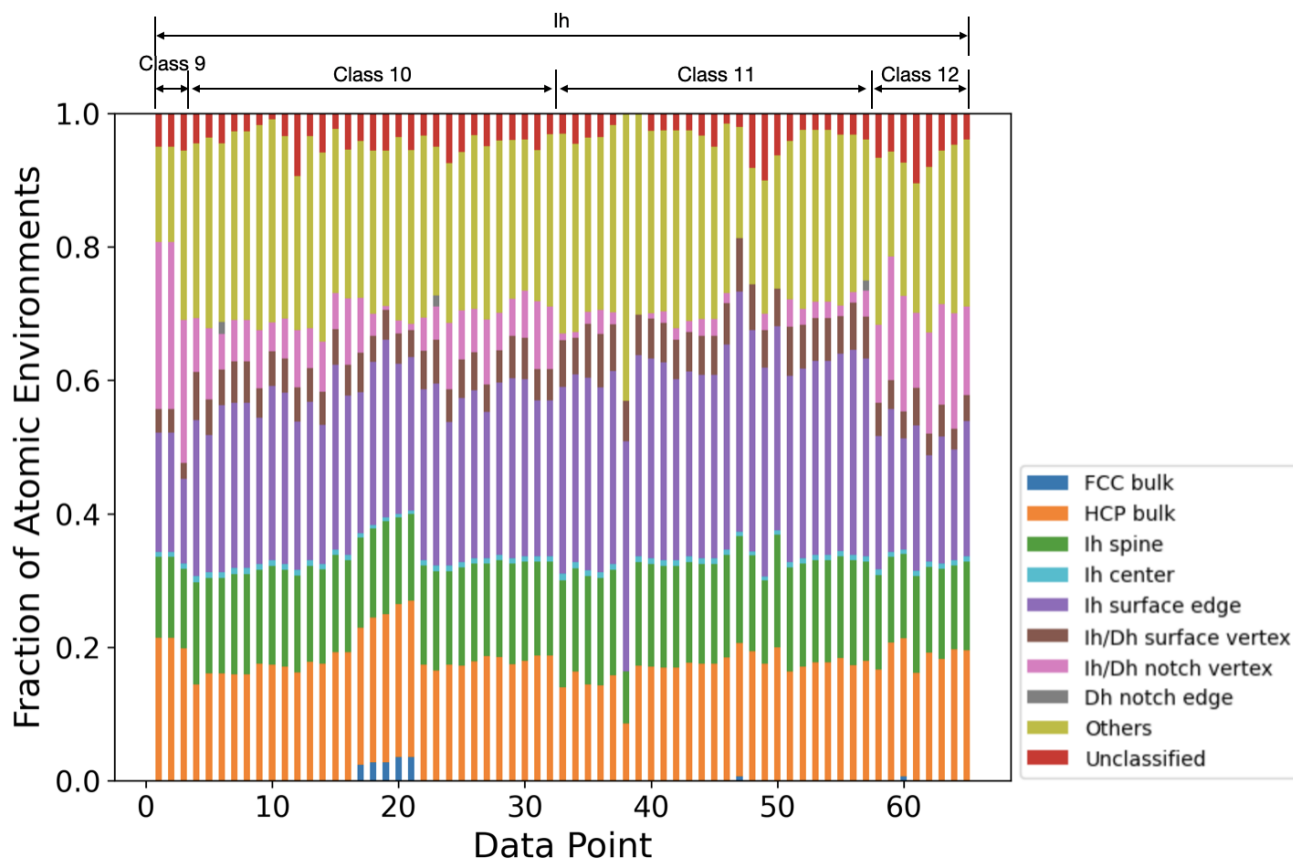

Figure S8: Fraction of atomic CNA environments (see Table S1) for the four Ih classes for Cu.

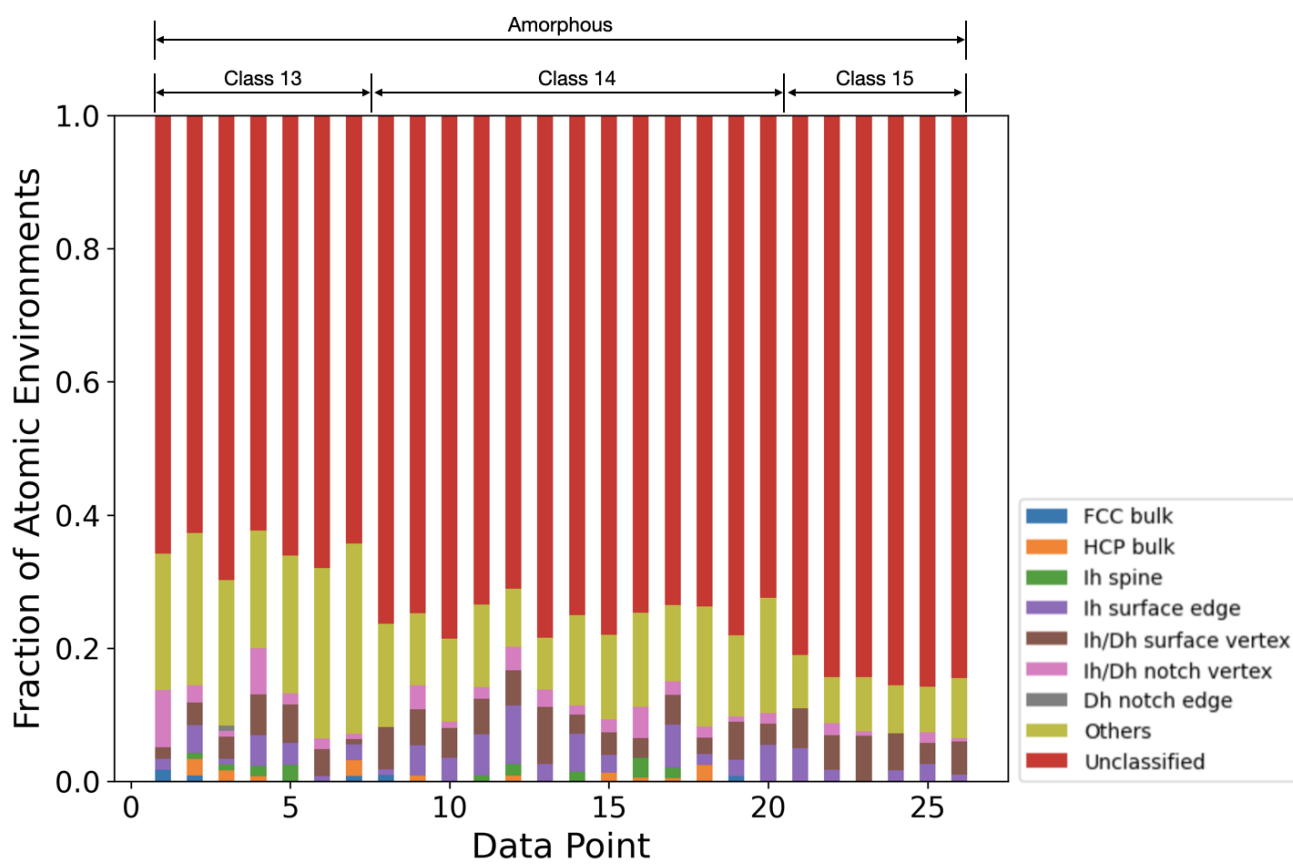

Figure S9: Fraction of atomic CNA environments (see Table S1) for the three Amorphous classes for Cu.
